# Supplementary material
Source: PubMed Central journal article supplement (PMC4503239)

A.

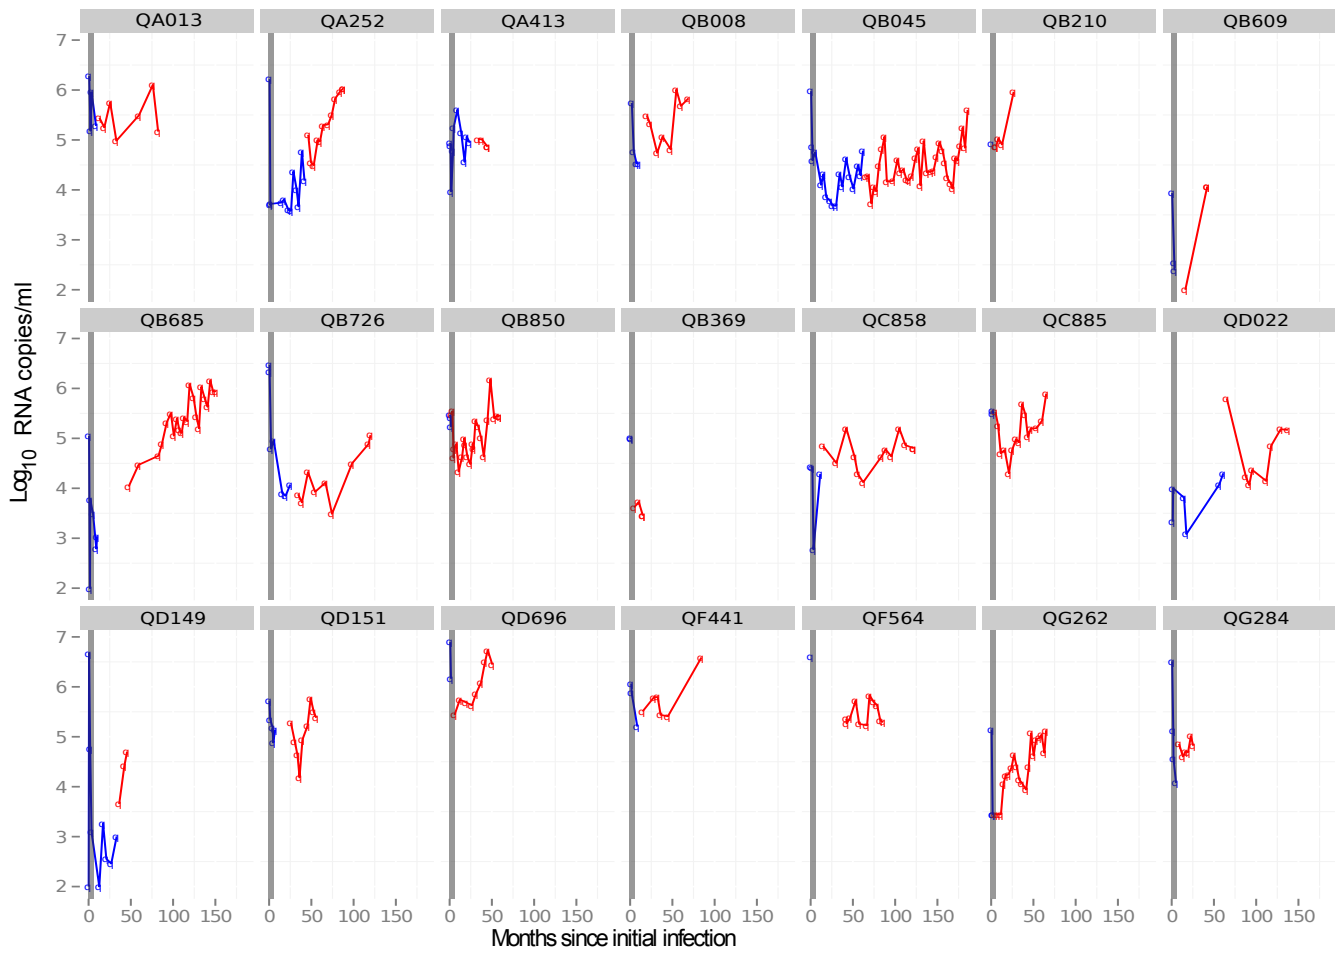

B.

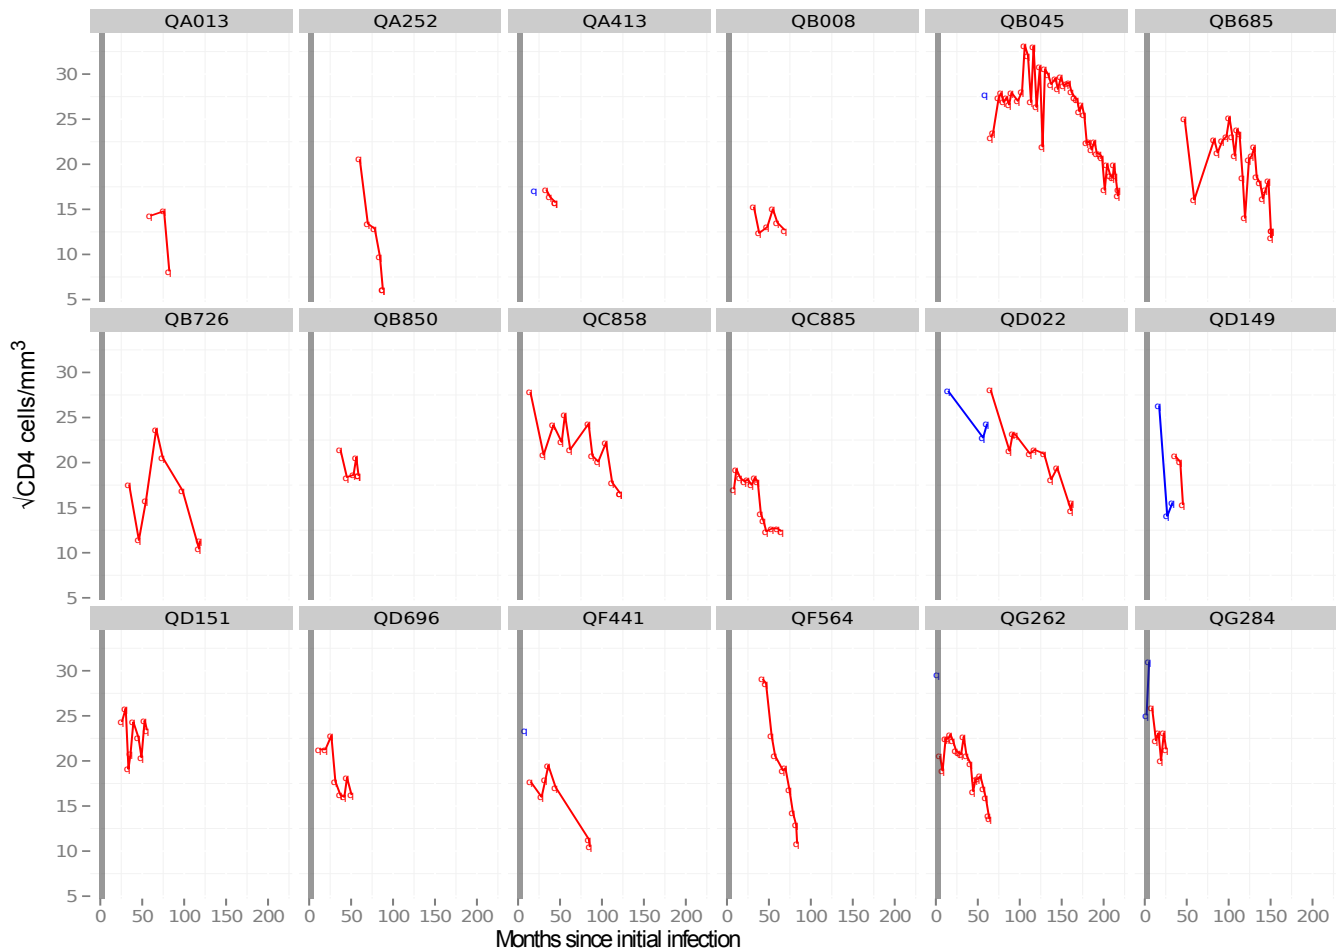

Supplement: NIHMS705963-supplement-Fig_S1.pdf [file NIHMS705963-supplement-Fig_S1.pdf]
